# Supplementary material
Source: Springer Nature journal article supplement (https://www.springermedizin.de/resource/supplementary/12985_2010_1090_MOESM7_ESM.pdf/9609118)
Supplement: MOESM7 [file 9609118]

**A****QuickAlign analysis of PCR product of  $\Phi$  PSS genome raised by single primer (Sc2)**

Query location shown as colored bar in map between reading frames 1 and 2.

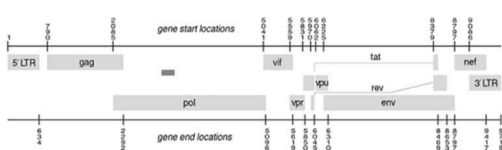

Query: 081201-22\_E07\_20-Sc2..ab1230  
 GACNNKHGGTTFIAATCTTTTTTTACTTCTATACCCNIGTAAGAAA  
 GTNTTGTGCAAAANNTTFAATCTCTTTTCTCTACCCCTTCCACTAGT  
 GGHTCTGCCCCCTACTATNGGGTTTGGATAGTGCCCAAGATTTCCCGT  
 CCAGANCTTATTAATCAAGGTCATCAGGGGGTAGATACATCTOTAT  
 TTTGATGTCCGGAAAATGACTANTCTTN

Query Length: 234

HB2 Location: genome: 3046? 3273reverse complement

Alignment used: HIV1 Complete DNA, 1240 sequences\*

\* Matched with different sequences from all over the world HIV genotype

Query location shown as colored bar in map between reading frames 1 and 2.

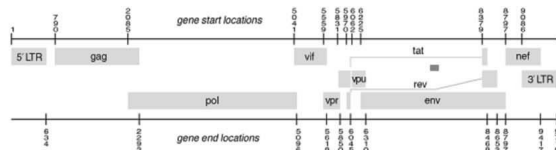

Query: 081201-22\_K05\_17-Ac2.ab1126  
 ACNHCANENHENTHTNHGHNCAGATAAAAAGAGGGCCGAAAGGGGGGA  
 GTTCTGAGACCATCANGAGACCAAAATAGAA GTCTTAAQNA TTHFA  
 CCTTNCAGTAAAGCANNGTAGTCN

Query Length: 128

HB2 Location: genome: 7469? 7600

Alignment used: HIV1 Complete DNA, 1241 sequences\*

\* Matched with different sequences from all over the world HIV genotype

**B**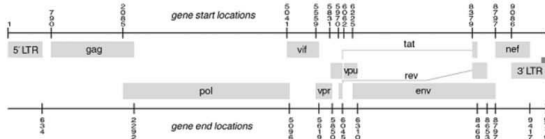

Query: 071002-R4\_G07\_31-  
 C3.ab1\_6-40\_0\_640\_ABI

NAA TGC GCAT AAT A GTGGTG GGGGCTCTGCTCCGGAGGAGAGGCC ACC  
 CCGAGGCCCTGGA GGGGGAGCCGATGTTCTCCCGGGGAGA GAAAT  
 CCCCCGGGGGGAGAAGATGTTCCCCCGAGGCTCTTGAATGTGGCATGG  
 CATTGTCCGGTGGTGGGATC CCTATTATCCA TCGAAGACCCTCTATT  
 TTCCCTA TAAATCA TGCATC CAGACAG GCACCTTCTGTAGCGCATCTAA  
 AGCC TATTCTTACA GGGGTGACGACCTGATCTCTCCCGGTGATGCTA  
 CATAATATCGGTGGCTGCTTAATCCAGACTGCTGATACATCTGACT  
 CTATGACAGCTCAGTAGCCCACTC GTAGAA TTTCTACAGATCAGGGG  
 ATAAAC TAAACCCACCCGACACATATCCGTTGTATTAACATCAC  
 CCCCCATTCTTGA TAAATCAAGCTGTGATAGTGGACTTAGCTCGAG  
 GAGCTTAACTTCCG CCA GAATGGAATAA CCCCAGCTGTGGTCCAAATC  
 CCTTAGCTGTATTCCACAGC GAAACAC CAGCTCAAAAATCTCCCGCA  
 GTACTGTGTGCTAGTAGTCTGCTGCATCCCTATGATGCTC

Query Length: 872

HB2 Location: genome: 9627? 9719

Alignment used: HIV1 Complete DNA, 698 sequences\*

\* Matched with different sequences from all over the world HCV genotype
